# Supplementary material for: Lithium peroxide crystal clusters as a natural growth feature of discharge products in Li–O2 cells
Source: publisher site journal article supplement (doi:10.3762/bjnano.4.86), 2013-11-15
Supplement: Additional file 1 [file 2190-4286-4-86-S1.pdf]

301 Moved Permanently

# Moved Permanently

The document has moved here.
